# Supplementary material for: Blueberry Counteracts Prediabetes in a Hypercaloric Diet-Induced Rat Model and Rescues Hepatic Mitochondrial Bioenergetics
Source: MDPI journal article supplement (doi:10.3390/nu13124192), 2021-11-23
Supplement: s1 [file s1]

## Supplementary Materials

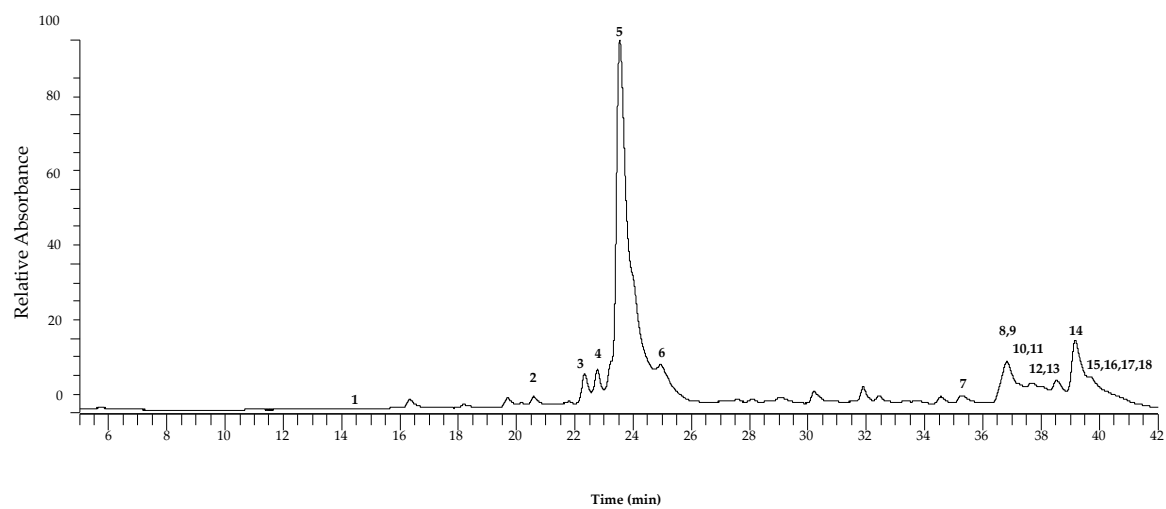

**Figure S1.** Chromatographic profile of phenolic compounds in BJ, obtained with HPLC-PDA-ESI/MSn (UV, 320nm).

**Table S1.** Polyphenol compounds identified in blueberry juice by HPLC-PDA-ESI/MS<sup>n</sup>.

| Peak | R <sub>t</sub><br>(min) | λ <sub>max</sub><br>(nm)         | ESI-MS <sup>n</sup> [ <i>m/z</i> (relative abundance, %)] |                                                                       |                                                                                        | Attempt to identify          | Refs. |
|------|-------------------------|----------------------------------|-----------------------------------------------------------|-----------------------------------------------------------------------|----------------------------------------------------------------------------------------|------------------------------|-------|
|      |                         |                                  | Precursor Ion [M-H] <sup>-</sup>                          | MS <sup>2</sup>                                                       | MS <sup>3</sup>                                                                        |                              |       |
| 1    | 14.22                   | 248sh, 271, 280sh                | 315                                                       | 153 (100)                                                             | 123 (100)                                                                              | Protocatechuic acid hexoside | [145] |
| 2    | 20.59                   | 250, 280, 299sh, 322sh           | 341                                                       | 179 (100)                                                             | 135 (100)                                                                              | Caffeic acid hexoside        | [145] |
| 3    | 22.33                   | 246, 285, 309, 320sh             | 341                                                       | 179 (100)                                                             | 135 (100)                                                                              | Caffeic acid hexoside        | [145] |
| 4    | 23.23                   | 248, 291, 299, 326               | 355                                                       | 217 (55), 193 (100), 175 (20)                                         | 178 (22), 149 (50), 134 (100)                                                          | Ferulic acid hexoside        | [146] |
| 5    | 23.54                   | 245, 291sh, 303sh, 326           | 353                                                       | 191 (100)                                                             | 173 (100), 171 (24)                                                                    | 5-CQA                        | [35]  |
| 6    | 24.93                   | 249, 291, 321                    | 353                                                       | 191 (100)                                                             | 173 (87), 171 (17), 155 (14), 127 (100), 111 (29), 109 (34), 93 (49), 87 (13), 85 (64) | <i>cis</i> -5-CQA            | [35]  |
| 7    | 35.27                   | 218, 249, 384sh, 347             | 463                                                       | 317 (78), 316 (100)                                                   | 287 (38), 272 (13), 271 (100), 270 (40), 179 (36), 151 (11)                            | Myricetin -O-deoxyhexoside   | [147] |
| 8    | 36.21                   | 218, 250, 278sh, 335             | 463                                                       | 337 (16), 318 (10), 317 (65), 316 (100), 315 (13), 301 (18), 300 (27) | 288 (12), 287 (25), 271 (100), 270 (25)                                                | Myricetin -O-deoxyhexoside   | [147] |
| 9    | 36.84                   | 220, 253, 267sh, 287sh, 354      | 463                                                       | 302 (12), 301 (100), 300 (21)                                         | 273 (17), 257 (16), 179 (100), 151 (60)                                                | Quercetin-O-hexoside         | [148] |
| 10   | 37.33                   | 219, 249, 267, 282sh, 353, 527   | ---                                                       | ---                                                                   | ---                                                                                    | Delfinidin derivative        | [149] |
| 11   | 37.72                   | 220, 248, 270, 281sh, 348, 529   | 569                                                       | 523 (68), 491 (100)                                                   | 343 (12), 331 (17), 329 (100), 328 (22)                                                | Malvidin hexoside            | [149] |
| 12   | 38.50                   | 219, 251, 267, 281sh, 352, 527   | 433                                                       | 301 (100)                                                             | 273 (13), 257 (10), 179 (100), 151 (71)                                                | Quercetin-O-pentoside        | [148] |
| 13   | 38.67                   | 219, 251, 267, 281sh, 352, 527   | ---                                                       | ---                                                                   | ---                                                                                    | Delfinidin – pentoside       | [149] |
| 14   | 39.16                   | 220, 254, 264sh, 284sh, 350, 530 | 447                                                       | 302 (11), 301 (100), 300 (19)                                         | 283 (10), 273 (17), 179 (100), 151 (65)                                                | Quercetin-O-deoxyhexoside    | [148] |
| 15   | 39.30                   | 220, 254, 264sh, 284sh, 350, 530 | ---                                                       | ---                                                                   | ---                                                                                    | Delfinidin                   | [149] |
| 16   | 39.69                   | 219, 253, 266sh, 283sh, 350, 530 | 447                                                       | 302 (15), 301 (100), 300 (19)                                         | 283 (15), 273 (20), 257 (12), 229 (10), 179 (100), 151 (74)                            | Quercetin-O-deoxyhexoside    | [148] |
| 17   | 39.90                   | 219, 253, 266sh, 283sh, 350, 530 | ---                                                       | ---                                                                   | ---                                                                                    | Petunidin                    | [149] |
| 18   | 39.90                   | 219, 253, 266sh, 283sh, 350, 530 | ---                                                       | ---                                                                   | ---                                                                                    | Malvidin                     | [149] |

Identification based on the UV-Vis spectra, the molecular weight, and the fragmentation patterns, which are according to references (Refs).

**Table S2.** Metabolites detected in the serum samples by <sup>1</sup>H-NMR analysis.

| Serum Metabolites                             | Chemical shift (ppm) | CTRL                | HSuHF                 | HSuHF + BJ          |
|-----------------------------------------------|----------------------|---------------------|-----------------------|---------------------|
| <b>Amino acids and BCAA metabolism</b>        |                      |                     |                       |                     |
| Isoleucine                                    | 0.997 - 1.001(d)     | 4.550e-5 ± 9.022e-6 | 4.073e-5 ± 1.146e-5   | 7.606e-5 ± 1.641e-5 |
| Valine                                        | 1.004 - 1.035(d)     | 0.0060 ± 0.0003     | 0.0046 ± 0.0004 *     | 0.0054 ± 0.0002     |
| Glutamine                                     | 2.45 (m)             | 0.0166 ± 0.0011     | 0.0136 ± 0.0013       | 0.0139 ± 0.0008     |
| Glycine                                       | 3.538 - 3.544        | 0.0068 ± 0.0009     | 0.0054 ± 0.0010       | 0.0074 ± 0.0008     |
| Alanine                                       | 1.45 (d)             | 0.0070 ± 0.0004     | 0.0058 ± 0.0004       | 0.0064 ± 0.0005     |
| Histidine                                     | 7.01 - 7.07 (s)      | 0.0011 ± 0.0001     | 0.0006 ± 0.0000 **    | 0.0007 ± 0.0000     |
| Serine                                        | 3.947 - 3.985        | 0.0038 ± 0.0004     | 0.0041 ± 0.0005       | 0.0041 ± 0.0003     |
| <b>Ketogenesis</b>                            |                      |                     |                       |                     |
| Acetoacetate/Acetone <sup>a</sup>             | 2.195 - 2.217 (s)    | 0.0032 ± 0.0007     | 0.0033 ± 0.0006       | 0.0040 ± 0.0006     |
| 3-Hydroxybutyrate                             | 1.16 - 1.189 (d)     | 0.0060 ± 0.0004     | 0.0024 ± 0.0005 ****  | 0.0042 ± 0.0005 *,# |
| 3 HB / Acetoacetate                           |                      | 1.1250 ± 0.0892     | 0.7038 ± 0.0051 ***   | 1.086 ± 0.0655 ##   |
| <b>TCA cycle metabolism and intermediates</b> |                      |                     |                       |                     |
| Acetate                                       | 1.89 - 1.90 (s)      | 0.0027 ± 0.0004     | 0.0022 ± 0.0002       | 0.0023 ± 0.0003     |
| Lactate                                       | 1.292 - 1.33 (d)     | 0.0800 ± 0.0094     | 0.0553 ± 0.0055 *     | 0.0604 ± 0.0048     |
| Succinate                                     | 2.379 - 2.387 (s)    | 0.0024 ± 0.0004     | 0.0020 ± 0.0003       | 0.0026 ± 0.0003     |
| Malic acid                                    | 4.261 - 4.307        | 0.0110 ± 0.002      | 0.0082 ± 0.002        | 0.0126 ± 0.001      |
| Glucose                                       | 5.189 - 5.235        | 0.0261 ± 0.001      | 0.0321 ± 0.0001 **    | 0.0290 ± 0.0000     |
| Lactate /Alanine                              |                      | 12.5900 ± 0.8709    | 9.1790 ± 1.1030       | 9.8990 ± 1.2950     |
| <b>Plasma protein</b>                         |                      |                     |                       |                     |
| N-acetyl-glycoproteins                        | 2.004- 2.045(s)      | 0.0165 ± 0.0010     | 0.0127 ± 0.011 *      | 0.0109 ± 0.0007 **  |
| <b>Creatine metabolism</b>                    |                      |                     |                       |                     |
| Creatine                                      | 3.005 - 3.023(s)     | 0.0034 ± 0.0004     | 0.0031 ± 0.0003       | 0.0030 ± 0.0004     |
| <b>Choline metabolism</b>                     |                      |                     |                       |                     |
| Choline                                       | 3.175 - 3.184(s)     | 0.0055 ± 0.0010     | 0.0041 ± 0.0008       | 0.0052 ± 0.0010     |
| Betaine                                       | 3.26(s)              | 1.58e+11 ± 2.38e11  | 8.68e+10 ± 1.04e10 *  | 1.40e+11 ± 7.64e11  |
| <b>Fatty acid metabolism</b>                  |                      |                     |                       |                     |
| Glycerol                                      | 3.64 - 3.635         | 0.0063 ± 0.0007     | 0.0049 ± 0.0005       | 0.0047 ± 0.0002     |
| <b>Others</b>                                 |                      |                     |                       |                     |
| Unknown (DMSO?)                               | 3.13 (s)             | 0.0010 ± 0.0001     | 0.0003 ± 7.98e-5 **** | 0.0006 ± 7.89e-5 ** |
| Mannose                                       | 5.149 - 5.176        | 0.0009 ± 0.000      | 0.0011 ± 0.0002       | 0.0010 ± 0.000      |

Results are expressed as mean ± SEM. n = 8 – 10/group; \* p<0.05, \*\* p<0.01, \*\*\* p<0.001, and \*\*\*\* p<0.0001 vs. CTRL; # p<0.05, ## p<0.01 vs. HSuHF.

<sup>a</sup> Putatively annotated as level 3 of identification according to Chemical Analysis Working Group (CAWG) Metabolomics Standards Initiative recommendations. All other metabolites identified as level 2.

Table S3. Metabolites detected in liver samples by <sup>1</sup>H-NMR analysis.

| Hepatic metabolites                           | Chemical shift (ppm) | CTRL             | HSuHF                | HSuHF + BJ              |
|-----------------------------------------------|----------------------|------------------|----------------------|-------------------------|
| <b>Amino acids and BCAA metabolism</b>        |                      |                  |                      |                         |
| Alanine                                       | 1.48 (d)             | 0.0062 ± 0.0002  | 0.0058 ± 0.0002      | 0.0049 ± 0.0001 ****,## |
| Aspartate                                     | 2.80 (m)             | 0.0007 ± 2.61e-5 | 0.0008 ± 6.53e-5     | 0.0007 ± 4.09e-5        |
| Glutamine                                     | 2.46 (m)             | 0.0151 ± 0.0005  | 0.0159 ± 0.0006      | 0.0159 ± 0.0006         |
| Glutamate                                     | 2.36 (m)             | 0.0059 ± 0.0005  | 0.0066 ± 0.0006      | 0.0051 ± 0.0003         |
| Glycine                                       | 3.56 (s)             | 0.0052 ± 0.0002  | 0.0046 ± 0.0002      | 0.0046 ± 0.0001         |
| Histidine                                     | 7.13 (s)             | 0.0002 ± 2.21e-5 | 0.0002 ± 2.77e-5     | 0.0002 ± 2.88e-5        |
| Isoleucine                                    | 1.01 (d)             | 0.0012 ± 3.40e-5 | 0.0009 ± 4.59e-5 *** | 0.0010 ± 3.16e-5        |
| Leucine                                       | 0.96(d)              | 0.0017 ± 3.31e-5 | 0.0016 ± 0.0001      | 0.0015 ± 3.41e-5        |
| Phenylalanine                                 | 7.29-7.45 (m)        | 0.0012 ± 4.38e-5 | 0.0010 ± 0.0001      | 0.0009 ± 2.56e-5        |
| Taurine                                       | 3.43 (t)             | 0.0024 ± 0.0004  | 0.0026 ± 0.0003      | 0.0045 ± 0.0005 **, #   |
| Tyrosine                                      | 6.91(d),7.18 (d)     | 0.0004 ± 2.00e-5 | 0.0003 ± 3.34e-5     | 0.0003 ± 1.32e-5        |
| Valine                                        | 1.05 (d)             | 0.0019 ± 7.40e-5 | 0.0015 ± 0.0001 *    | 0.0014 ± 4.12e-5        |
| <b>Ketogenesis</b>                            |                      |                  |                      |                         |
| 3-Hydroxybutyrate                             | 1.20 (d)             | 0.0011 ± 5.90e-5 | 0.0013 ± 0.0001      | 0.0014 ± 7.67e-5        |
| <b>TCA cycle metabolism and intermediates</b> |                      |                  |                      |                         |
| Acetate                                       | 1.92 (s)             | 0.0012 ± 5.58e-5 | 0.0011 ± 9.77e-5     | 0.0010 ± 2.97e-5        |
| Lactate                                       | 1.33 (d)             | 0.0196 ± 0.0007  | 0.0189 ± 0.0009      | 0.0169 ± 0.0006         |
| Succinate                                     | 2.41 (s)             | 0.0076 ± 0.0003  | 0.0064 ± 0.0003      | 0.0061 ± 0.0005         |
| Glucose                                       | 5.24 (d)             | 0.0149 ± 0.0008  | 0.0182 ± 0.0009 *    | 0.0163 ± 0.0005         |
| <b>Creatine metabolism</b>                    |                      |                  |                      |                         |
| Creatine                                      | 3.03 (s)             | 0.0008 ± 3.73e-5 | 0.0005 ± 0.0001 *    | 0.0008 ± 7.66e-5        |
| <b>Choline metabolism</b>                     |                      |                  |                      |                         |
| Choline                                       | 3.20 (s)             | 0.022 ± 0.0001   | 0.0022 ± 0.0008      | 0.0022 ± 0.0002         |
| Phosphocholine                                | 3.22(s)              | 0.0152 ± 0.0008  | 0.0092 ± 0.0021      | 0.0108 ± 0.0034         |
| Glycerolphosphocholine                        | 3.67 (m)             | 0.0106 ± 0.0004  | 0.0092 ± 0.0003      | 0.0089 ± 0.0006         |
| Betaine                                       | 3.25 (s)             | 0.0191 ± 0.0153  | 0.0076 ± 0.0007 **   | 0.0164 ± 0.0029 #       |
| <b>Microbial metabolism</b>                   |                      |                  |                      |                         |
| TMAO                                          | 3.27 (s)             | 0.0045 ± 0.0007  | 0.0039 ± 0.0006      | 0.0068 ± 0.0007 #       |
| <b>Others</b>                                 |                      |                  |                      |                         |
| Glutathione                                   | 2.97 (d)             | 0.0035 ± 0.0014  | 0.0028 ± 0.0002 *    | 0.0034 ± 0.0002         |
| Nicotinurate                                  | 8.94 (m)             | 0.0004 ± 2.60e-5 | 0.0003 ± 3.46e-5     | 0.0003 ± 4.04e-5        |
| NADP+                                         | 9.30 (s)             | 0.0004 ± 2.20e-5 | 0.0004 ± 2.59e-5     | 0.0004 ± 1.53e-5        |
| NAD                                           | 9.34 (s)             | 0.0007 ± 3.10e-5 | 0.0008 ± 5.04e-5     | 0.0009 ± 5.20e-5        |

Results are expressed as mean ± SEM. n = 8 – 10/group; \* p<0.05, \*\* p<0.01, \*\*\* p<0.001 and \*\*\*\* p<0.0001 vs. CTRL; # p<0.05, ## p<0.01 vs. HSuHF.
